# INFOGRAPHICS IN ANESTHESIOLOGY

Complex Information for Anesthesiologists Presented Quickly and Clearly

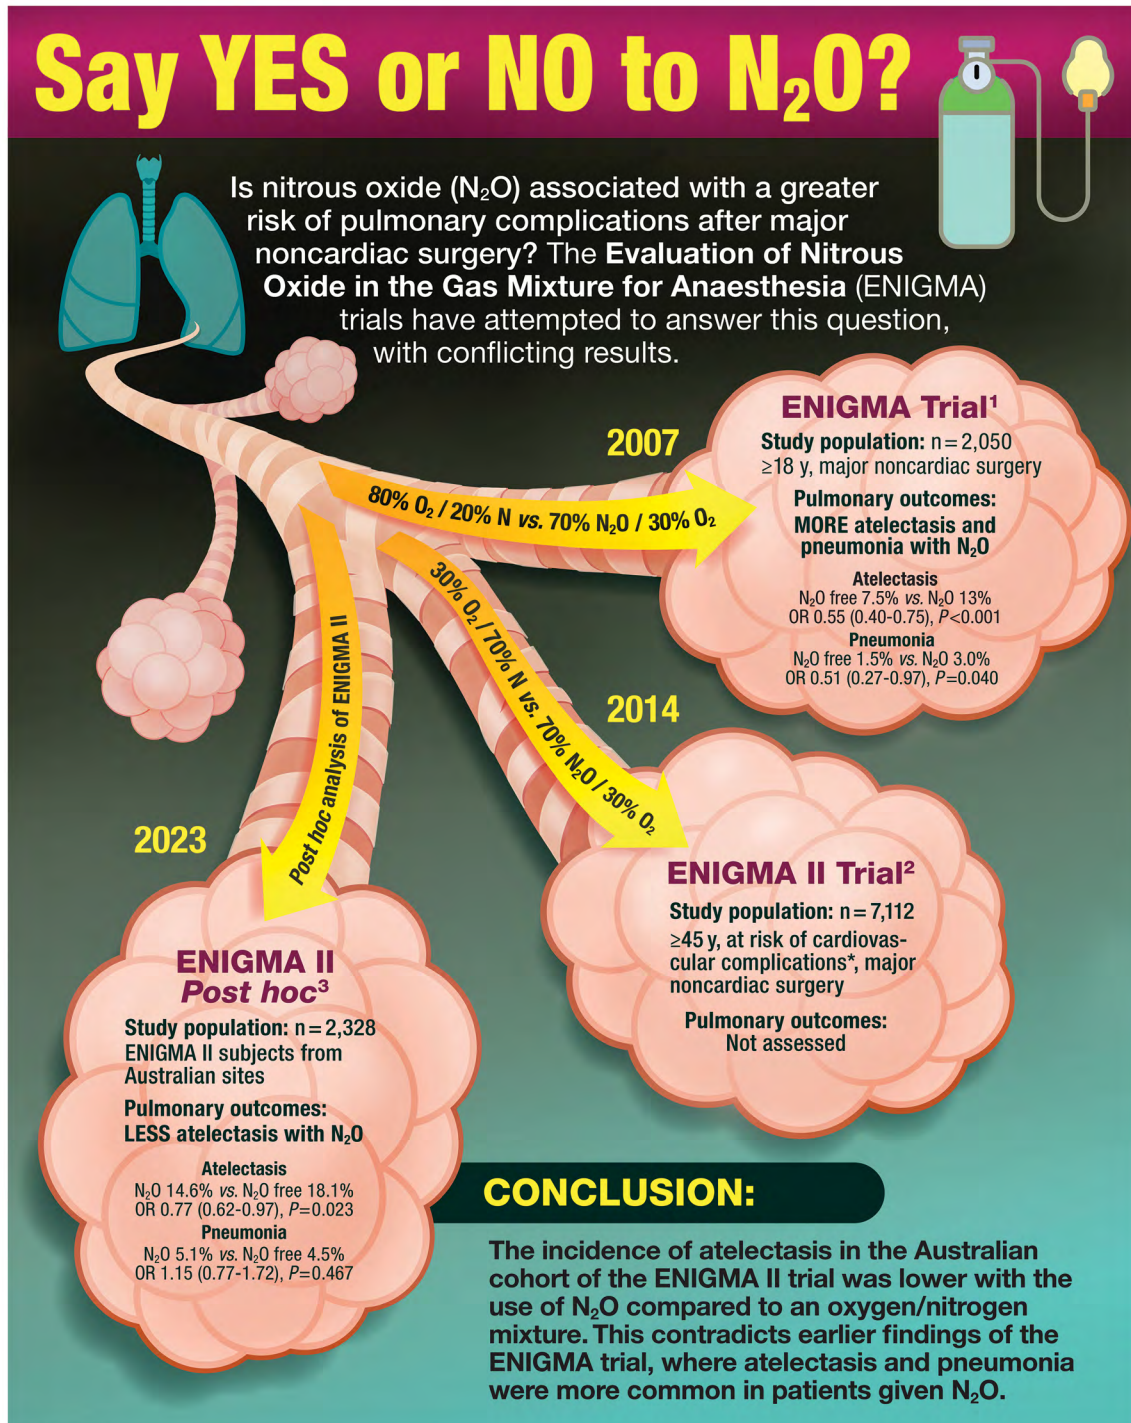

\*ENIGMA II trial cardiac risk factors included history of coronary artery disease, heart failure, cerebrovascular disease, or peripheral vascular disease, or age ≥70 yr with other comorbidities  
Infographic created by Holly B. Ende, Vanderbilt University Medical Center; James P. Rathmell, Brigham and Women's Health Care/Harvard Medical School; and Jonathan P. Wanderer, Vanderbilt University Medical Center. Illustration by Annemarie Johnson, Vivo Visuals Studio. Address correspondence to Dr. Ende: holly.ende@vumc.org.

1. Myles PS, Leslie K, Chan MTV, Forbes A, Paech MJ, Peyton P, Silbert BS, Pascoe E, and the ENIGMA Trial Group: Avoidance of nitrous oxide for patients undergoing major surgery. *ANESTHESIOLOGY* 2007; 107:221-31
2. Myles PS, Leslie K, Chan MTV, Forbes A, Peyton PJ, Paech MJ, Beattie WS, Sessler DI, Devereaux PJ, Silbert B, Schricker T, Wallace S; ANZCA Trials Group for the ENIGMA-II investigators: The safety of addition of nitrous oxide to general anaesthesia in at-risk patients having major non-cardiac surgery (ENIGMA-II): A randomised, single-blind trial. *Lancet* 2014; 384:1446-54
3. Peyton PJ, Liskaser G, Ho A, Marsh H, Etherington C, Torlot F, Desai M, Perrett G, Chee B, Leslie K, Myles PS: Postoperative pulmonary complications in the ENIGMA II Trial: A post hoc analysis. *ANESTHESIOLOGY* 2023; 138:354-63
